# Supplementary material for: Localization and recognition of human action in 3D using transformers
Source: PubMed Central journal article supplement — Commun Eng. 2024 Sep 3;3:125. doi: 10.1038/s44172-024-00272-7 (PMC11372174; doi:10.1038/s44172-024-00272-7), 2024-09-03
Supplement: 44172_2024_272_MOESM1_ESM.pdf [file 44172_2024_272_MOESM1_ESM.pdf]

# Description of Additional Supplementary Files

**File name:** Supplementary Software 1

**Description:** Visualization results from different approaches
